# Supplementary material for: Ferrocene-modified pyrimidine nucleosides: synthesis, structure and electrochemistry
Source: Royal Society of Chemistry journal article supplement (doi:10.1039/b608077d), 2006-01-01
Supplement: b608077d.pdf [file b608077d.pdf]

# Ferrocene-Modified Pyrimidine Nucleosides: Synthesis, Structure and Electrochemistry

Haifeng Song, Xiaohong Li, Yitao Long, Gabriele Schatte and Heinz-Bernhard Kraatz\*

Department of Chemistry, University of Saskatchewan, 110 Science Place, Saskatoon, SK, Canada,

S7N 5C9.

E-mail: kraatz@skyway.usask.ca; Fax: +1-306-966-4730; Tel: +1-306-966-4660

## 1. Mass spectra

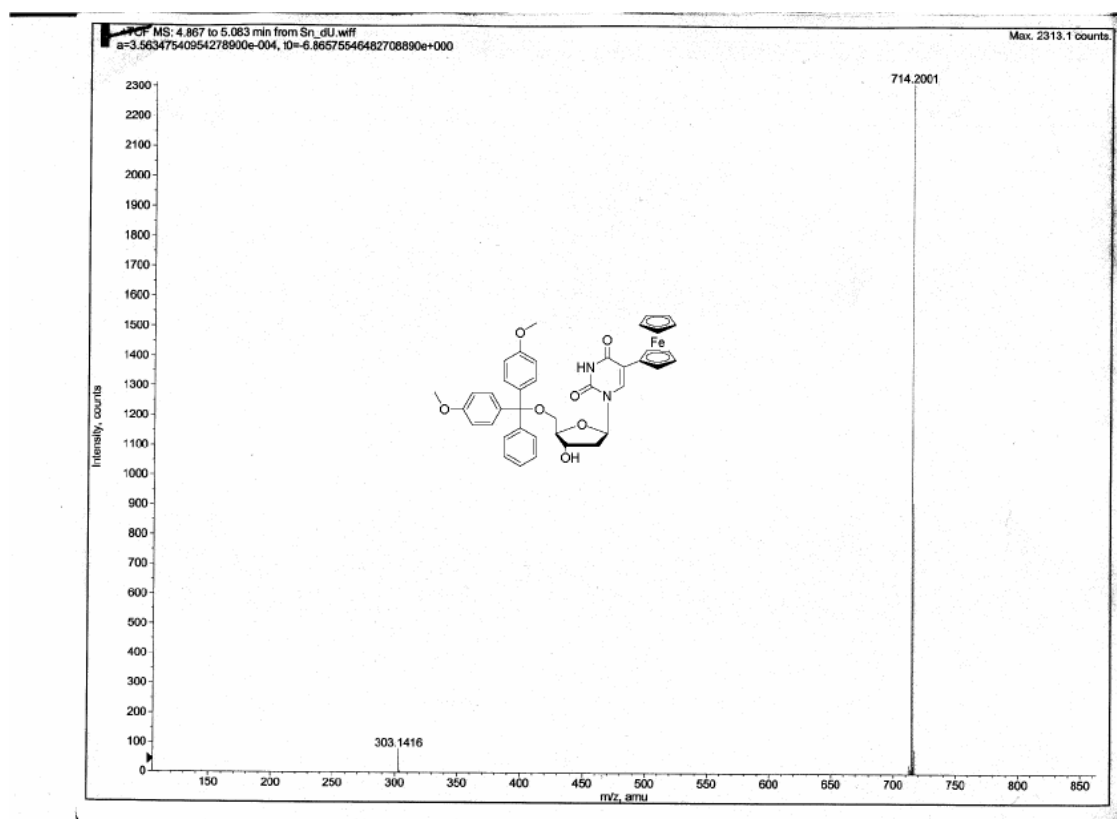

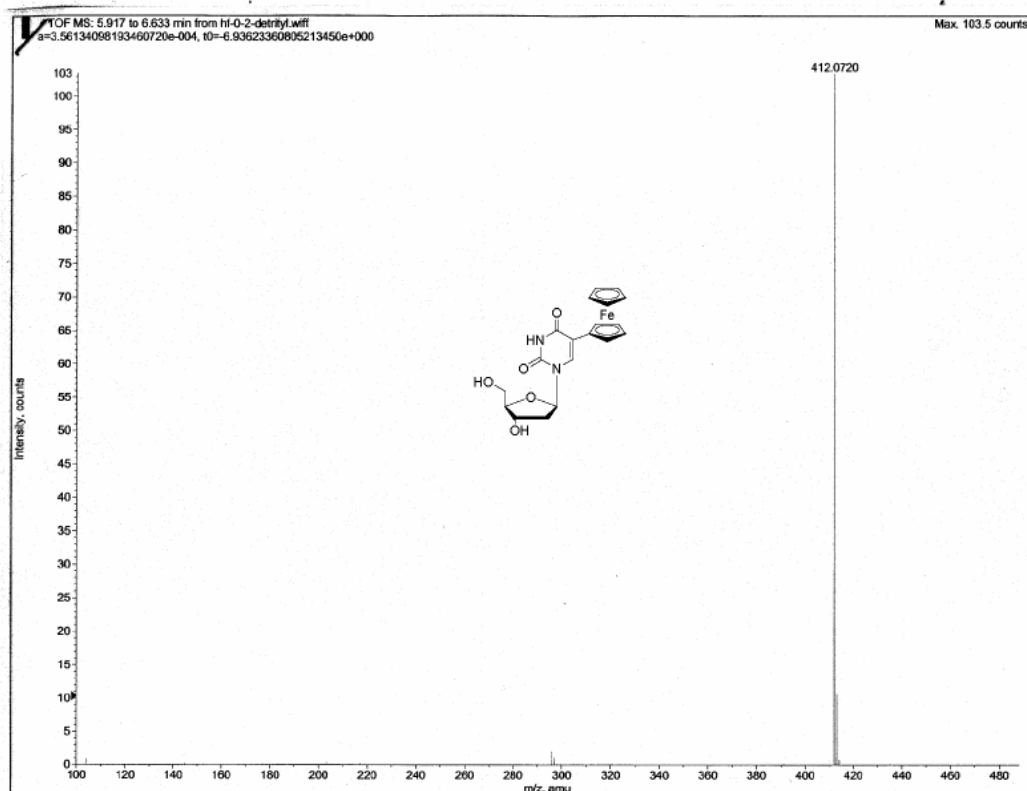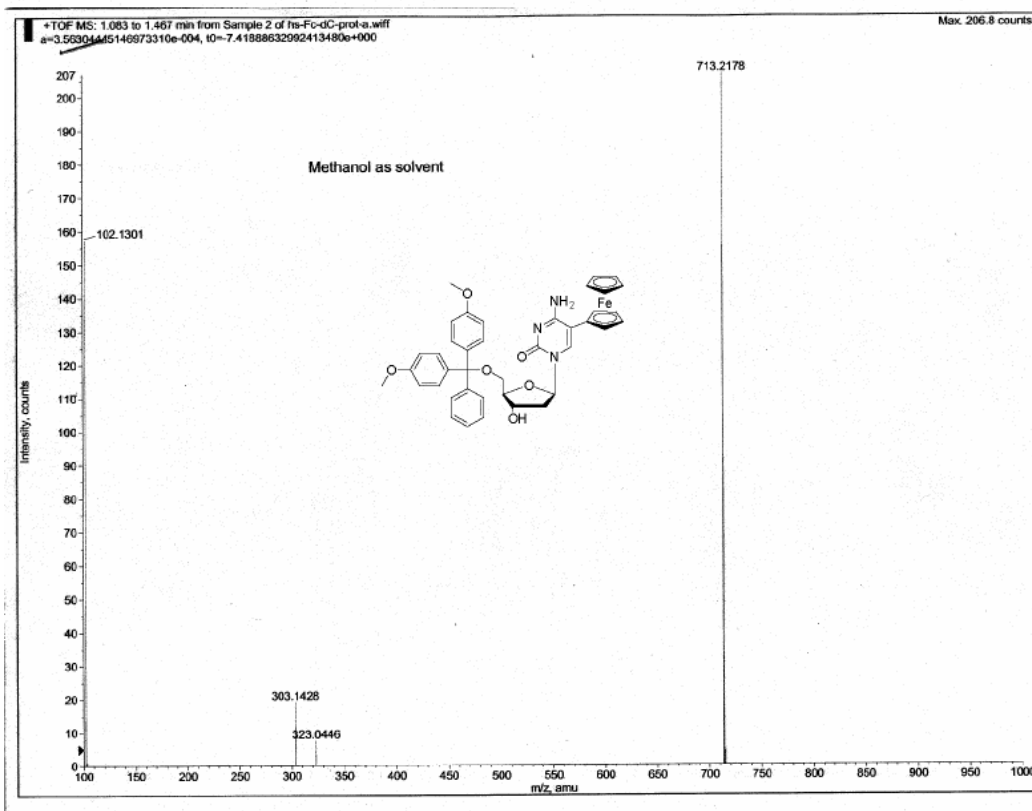

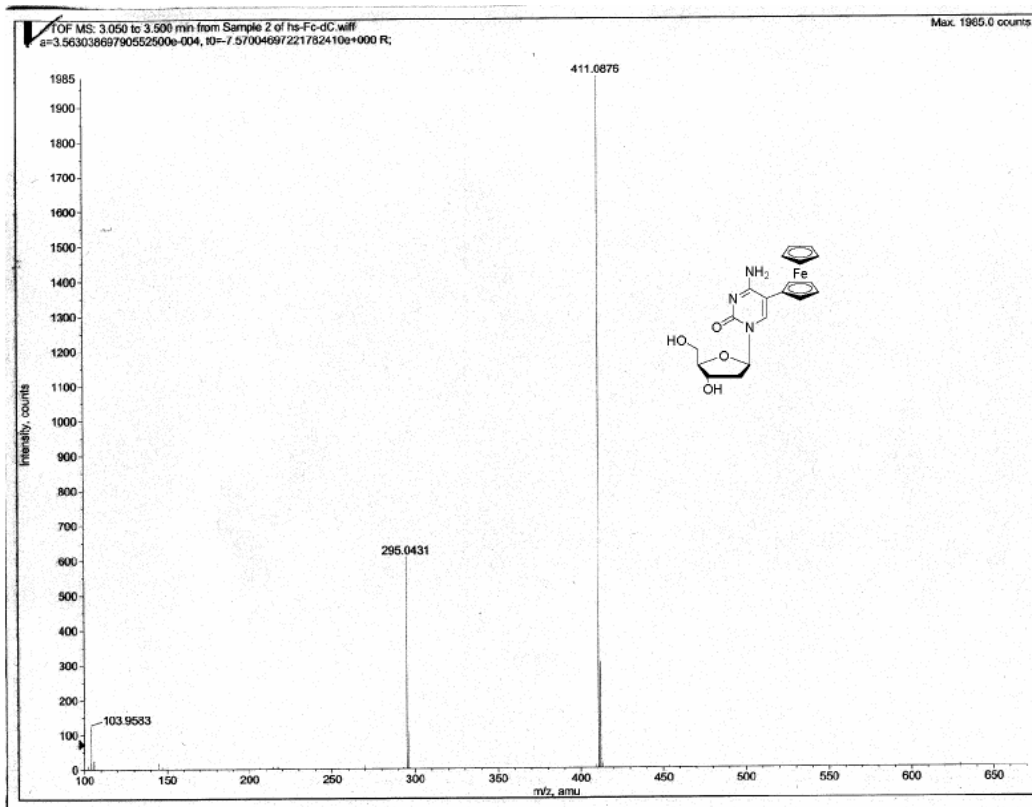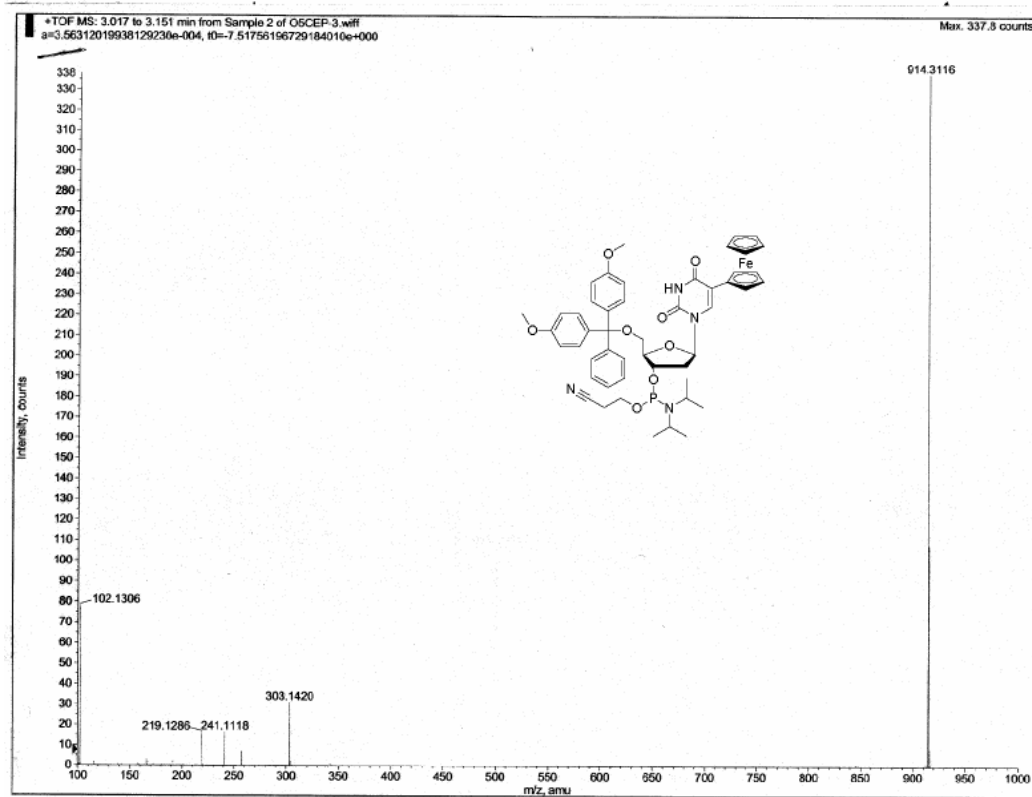

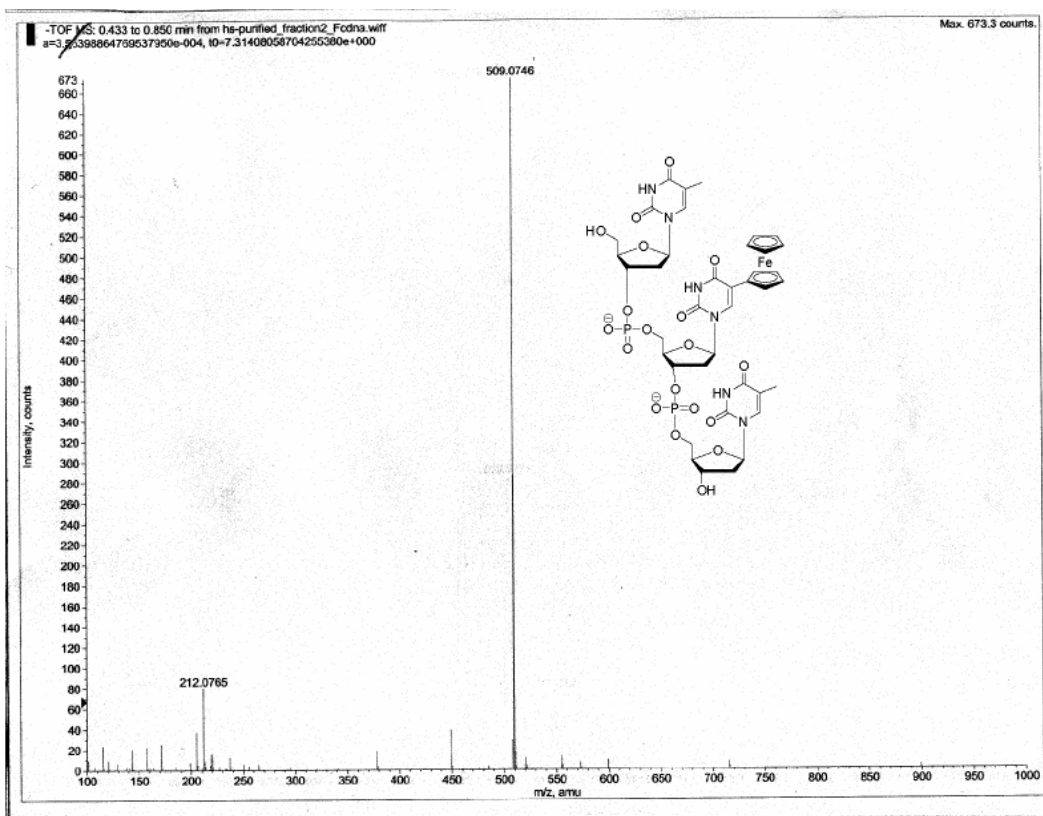

## 2. Solid phase synthesis apparatus

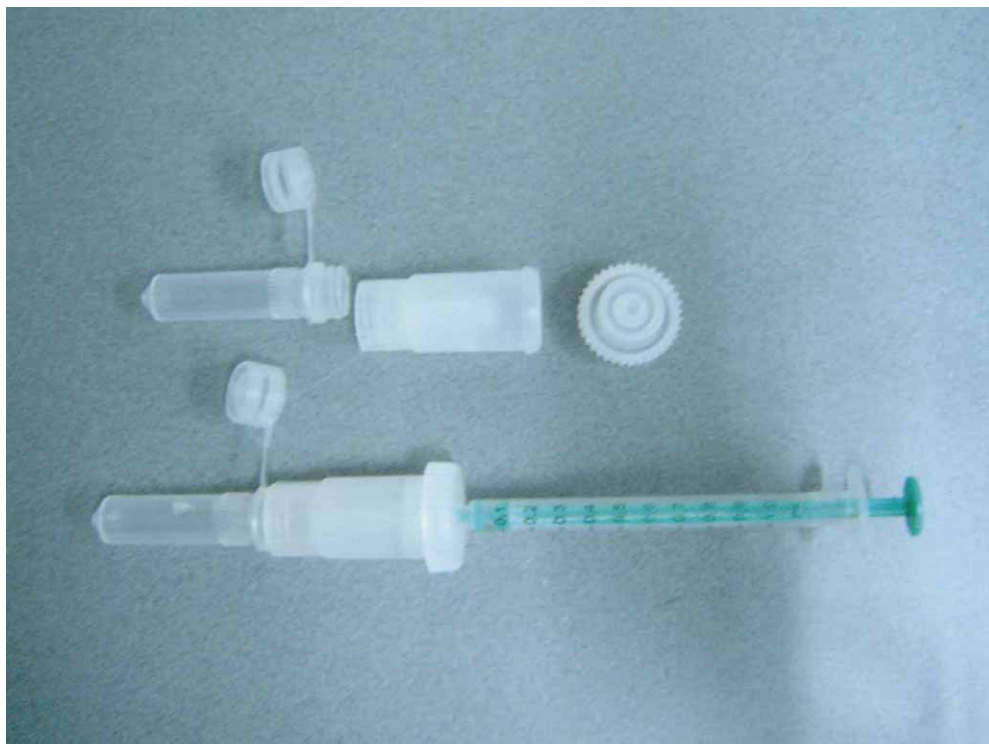

3. Cyclic voltammogram of TU<sup>Fc</sup>T and compound 3

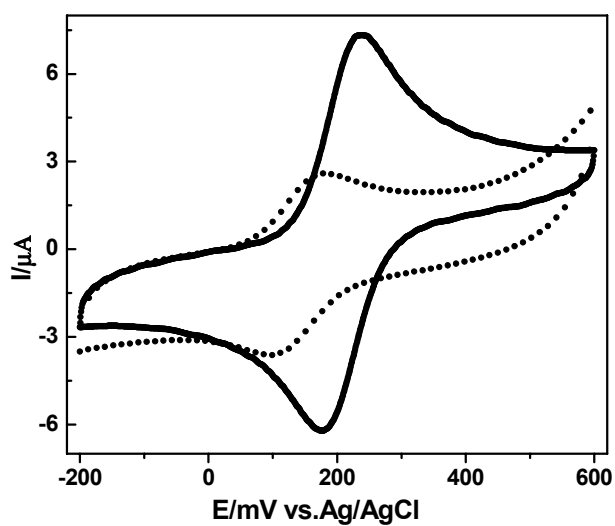

Cyclic voltammogram of 1.0 mM compound 3 (—) and 0.5 mM TU<sup>Fc</sup>T trimer (····) in 0.2 M NaClO<sub>4</sub> in H<sub>2</sub>O.
